# Supplementary material for: Deep echocardiography: data-efficient supervised and semi-supervised deep learning towards automated diagnosis of cardiac disease
Source: PubMed Central journal article supplement (PMC6550282; doi:10.1038/s41746-018-0065-x), 2018-10-18
Supplement: 41746_2018_65_MOESM1_ESM.pdf [file 41746_2018_65_MOESM1_ESM.pdf]

## Supplementary Material

### 240x320 Resolution

|                 | # Filters | Filter Size | Dropout | L2   |
|-----------------|-----------|-------------|---------|------|
| Conv            | 8         | 7           | -       | -    |
| Conv/Maxpool    | 8         | 7           | -       | -    |
| Conv            | 32        | 3           | -       | -    |
| Conv/Maxpool    | 32        | 3           | -       | -    |
| Conv            | 32        | 3           | -       | -    |
| Conv/Maxpool    | 32        | 3           | -       | -    |
| Conv            | 64        | 3           | -       | -    |
| Conv/Maxpool    | 64        | 3           | -       | -    |
| Conv            | 128       | 3           | -       | -    |
| Conv/Maxpool    | 128       | 3           | -       | -    |
| FC (1024 units) | -         | -           | 0.5     | 0.02 |
| FC (512 units)  | -         | -           | 0.5     | 0.02 |

### 120x160 Resolution

|                 | # Filters | Filter Size | Dropout | L2   |
|-----------------|-----------|-------------|---------|------|
| Conv            | 16        | 3           | -       | -    |
| Conv/Maxpool    | 16        | 3           | -       | -    |
| Conv            | 32        | 3           | -       | -    |
| Conv/Maxpool    | 32        | 3           | -       | -    |
| Conv            | 64        | 3           | -       | -    |
| Conv/Maxpool    | 64        | 3           | -       | -    |
| Conv            | 128       | 3           | -       | -    |
| Conv/Maxpool    | 128       | 3           | -       | -    |
| FC (1024 units) | -         | -           | 0.5     | 0.02 |
| FC (512 units)  | -         | -           | 0.5     | 0.02 |

### 60x80 Resolution

|      | # Filters | Filter Size | Dropout | L2 |
|------|-----------|-------------|---------|----|
| Conv | 32        | 3           | -       | -  |

|                  |     |   |     |      |
|------------------|-----|---|-----|------|
| Conv/AveragePool | 32  | 3 | -   | -    |
| Conv             | 64  | 3 | -   | -    |
| Conv/AveragePool | 64  | 3 | -   | -    |
| Conv             | 128 | 3 | -   | -    |
| Conv/AveragePool | 128 | 3 | -   | -    |
| FC (1024 units)  | -   | - | 0.5 | 0.02 |
| FC (512 units)   | -   | - | 0.5 | 0.02 |

### 30x40 Resolution

|                  | # Filters | Filter Size | Dropout | L2   |
|------------------|-----------|-------------|---------|------|
| Conv             | 16        | 3           | -       | -    |
| Conv/AveragePool | 16        | 3           | -       | -    |
| Conv             | 32        | 3           | -       | -    |
| Conv/AveragePool | 32        | 3           | -       | -    |
| Conv             | 64        | 3           | -       | -    |
| Conv/AveragePool | 64        | 3           | -       | -    |
| Conv             | 128       | 3           | -       | -    |
| Conv/AveragePool | 128       | 3           | -       | -    |
| FC (1024 units)  | -         | -           | 0.6     | 0.02 |
| FC (512 units)   | -         | -           | 0.6     | 0.02 |

### 15x20 Resolution

|                  | # Filters | Filter Size | Dropout | L2   |
|------------------|-----------|-------------|---------|------|
| Conv             | 64        | 3           | -       | -    |
| Conv/AveragePool | 64        | 3           | -       | -    |
| FC (1024 units)  | -         | -           | 0.4     | 0.02 |
| FC (512 units)   | -         | -           | 0.4     | 0.02 |

**Fig S1.** Tables detailing architecture of CNNs used for Varying Resolution Study. Input resolution from top: 240x320, 120x160, 60x80, 30x40. Batch normalization and by ReLU applied after convolution (Conv) and fully connected (FC) layer. For each architecture, an additional fully connected layer with softmax activation outputs prediction over 15 classes. Convolution layers have same padding and stride of 1. Pooling size of 2x2 used for Average and Max Pooling layers.

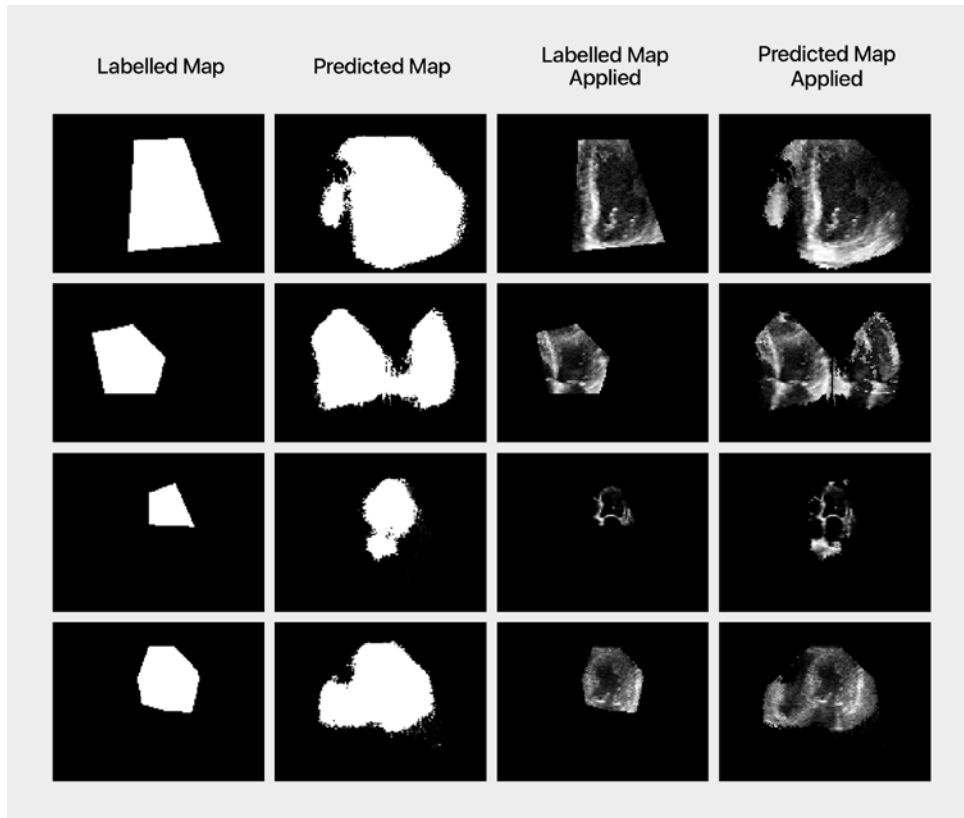

**Fig S2.** Figure of labeled map, predicted map, labeled and predicted map applied to original image for LVH Segmentation. Even in cases where there is a large difference between the labeled and the predict map, the amount of information loss after applying the predicted map is very limited.
